# Supplementary material for: Genomic insights into virulence mechanisms of Leishmania donovani: evidence from an atypical strain
Source: PubMed Central journal article supplement (PMC6262978; doi:10.1186/s12864-018-5271-z), 2018-11-28

**VL38 - chr1**

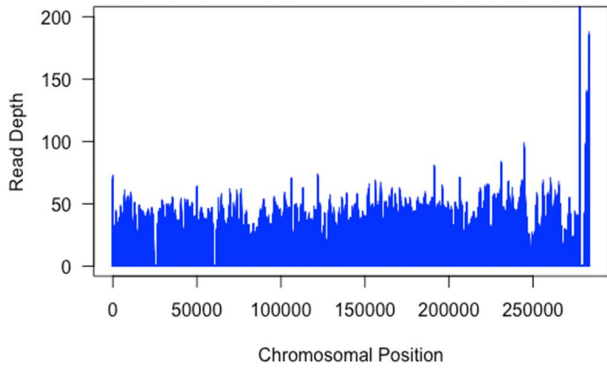

**VL38 - chr2**

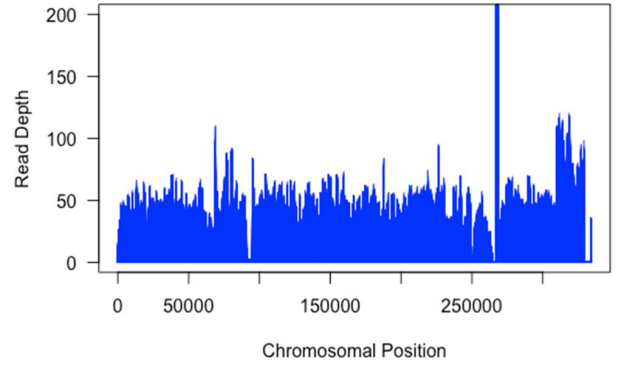

**VL38 - chr3**

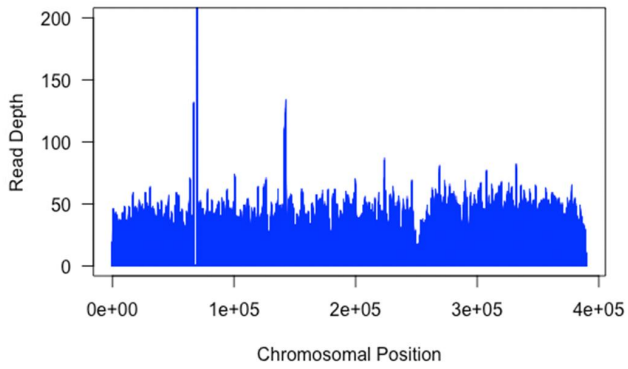

**VL38 - chr4**

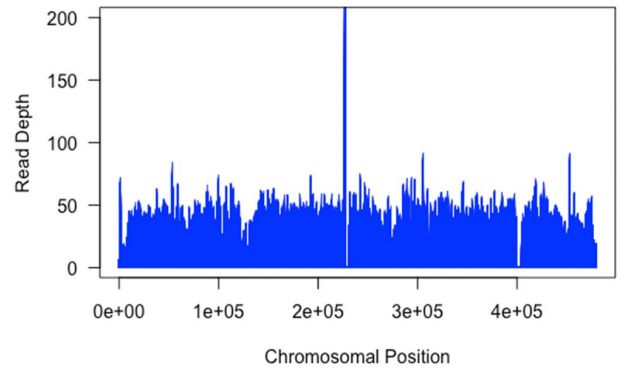

**VL38 - chr5**

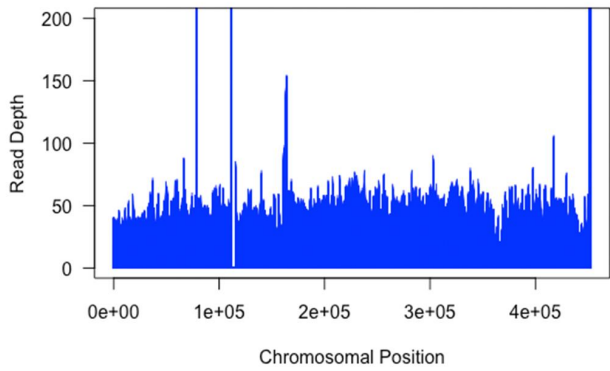

**VL38 - chr6**

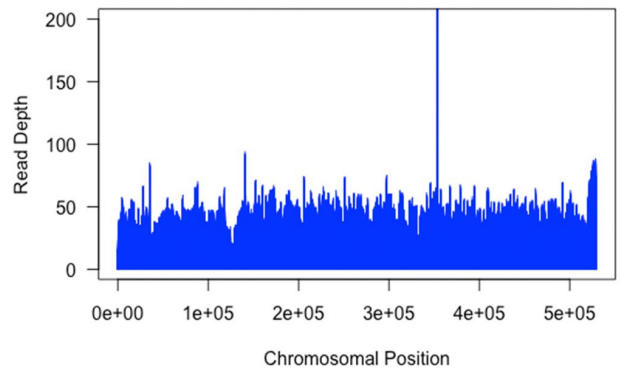

**VL38 - chr7**

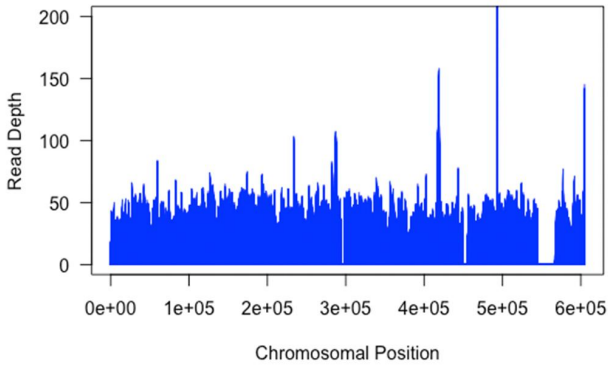

**VL38 - chr8**

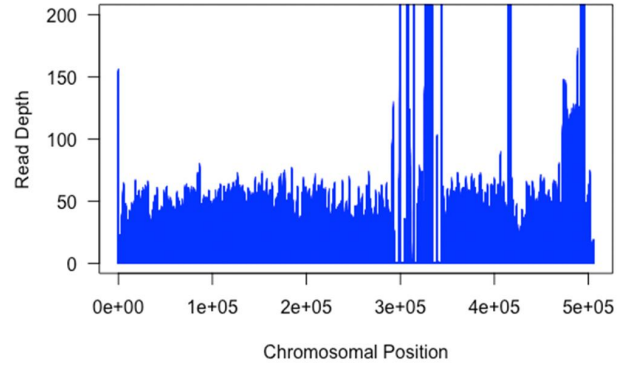

**VL38 - chr9**

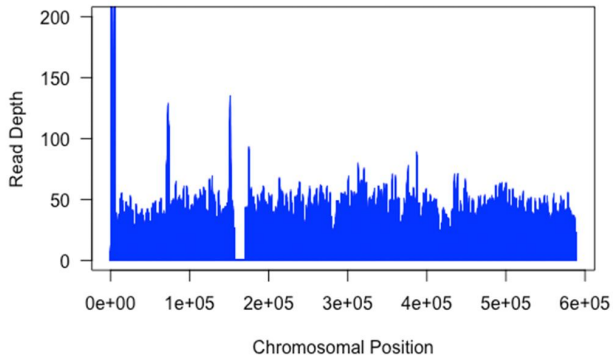

**VL38 - chr10**

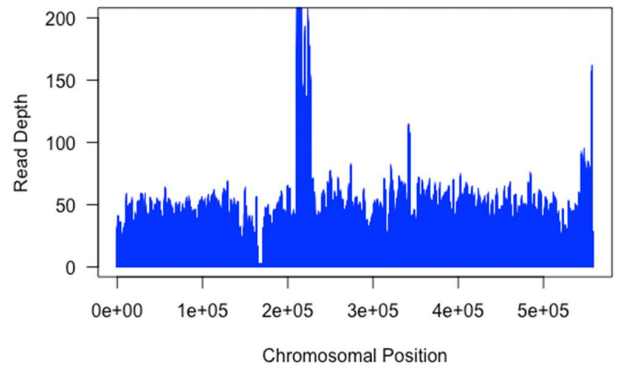

**VL38 - chr11**

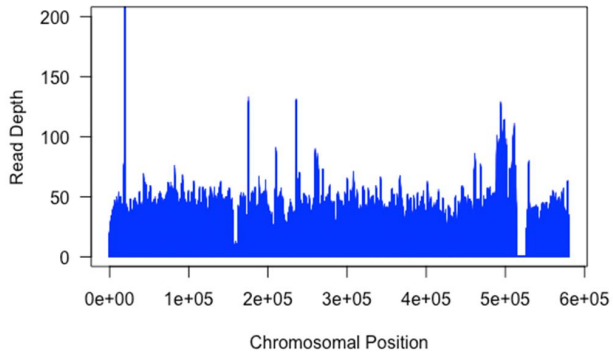

**VL38 - chr12**

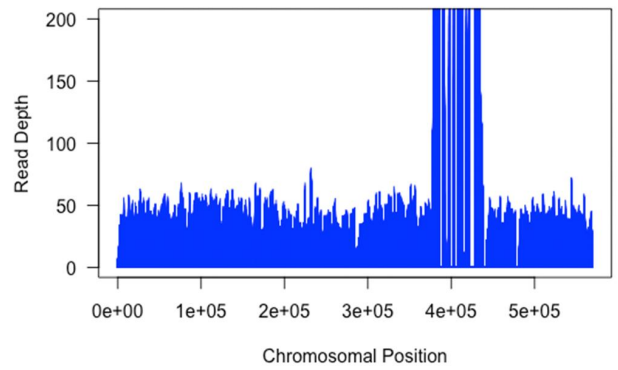

**VL38 - chr13**

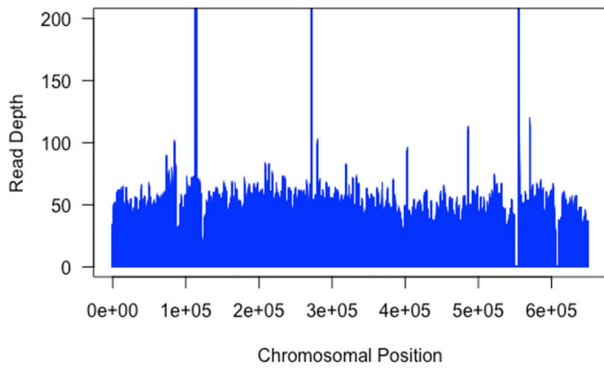

**VL38 - chr14**

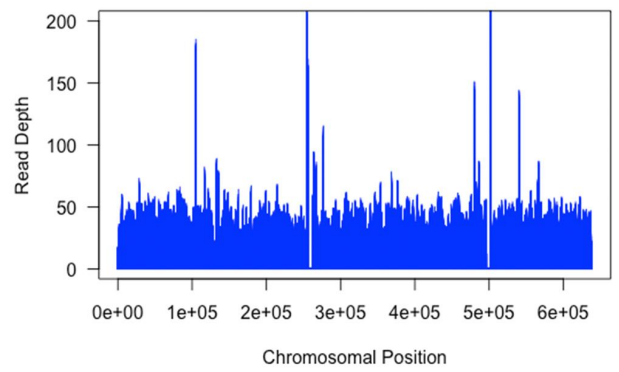

**VL38 - chr15**

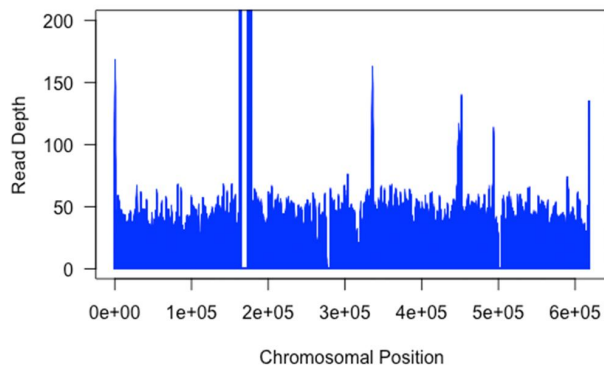

**VL38 - chr16**

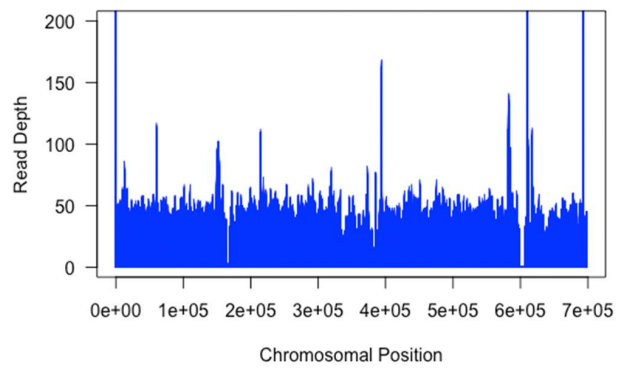

**VL38 - chr17**

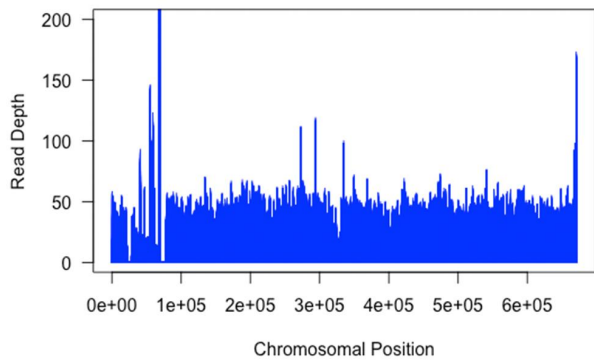

**VL38 - chr18**

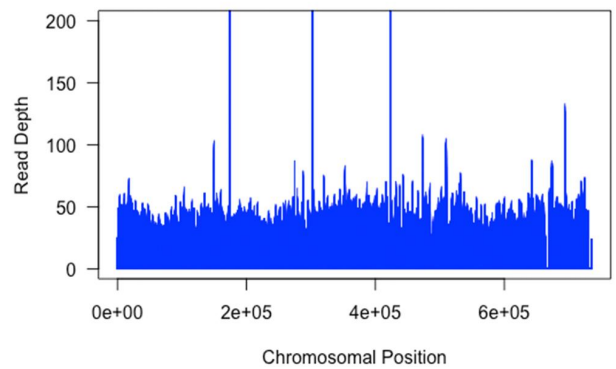

**VL38 - chr19**

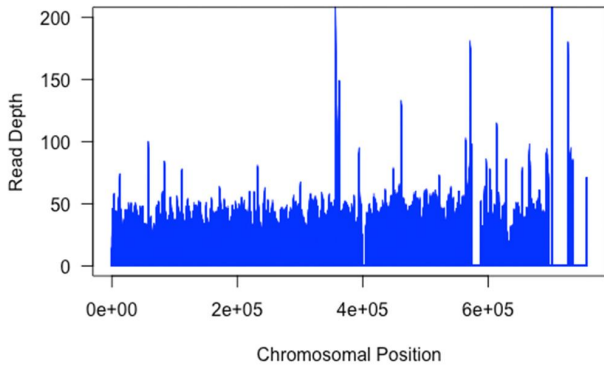

**VL38 - chr20**

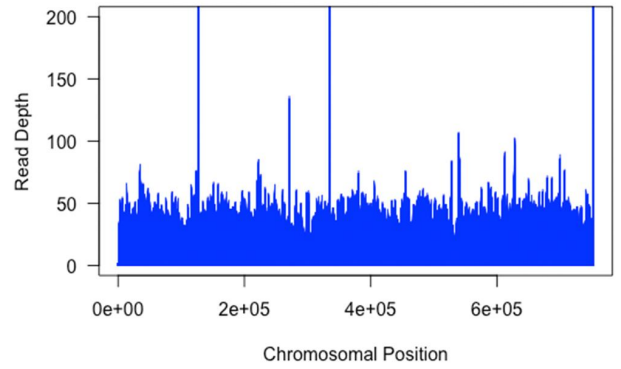

**VL38 - chr21**

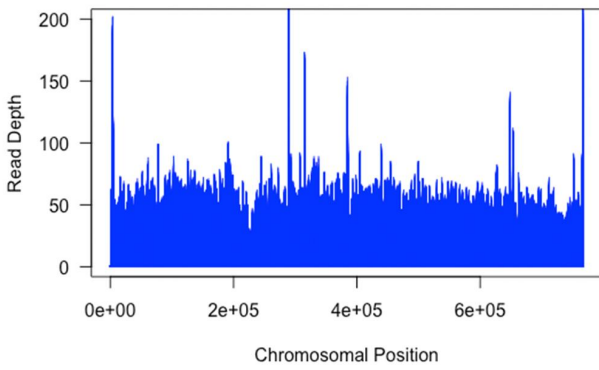

**VL38 - chr22**

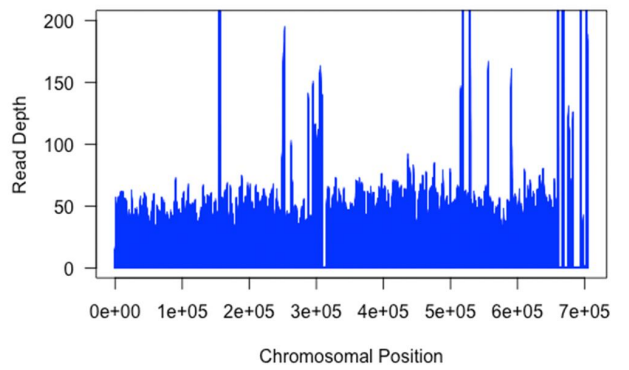

**VL38 - chr23**

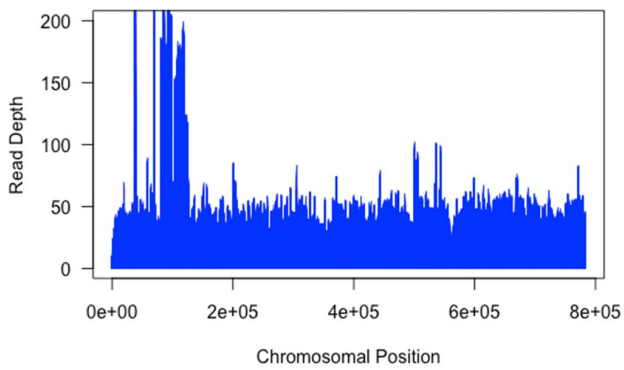

**VL38 - chr24**

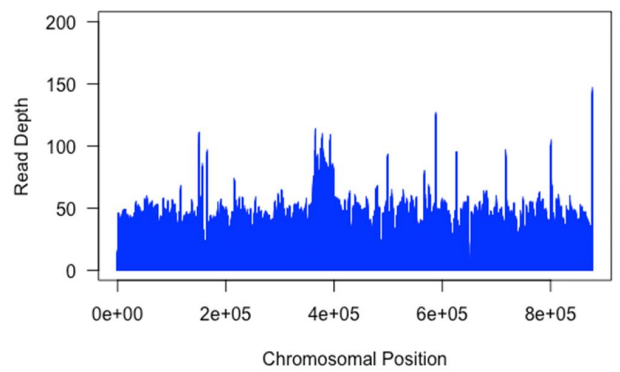

**VL38 - chr25**

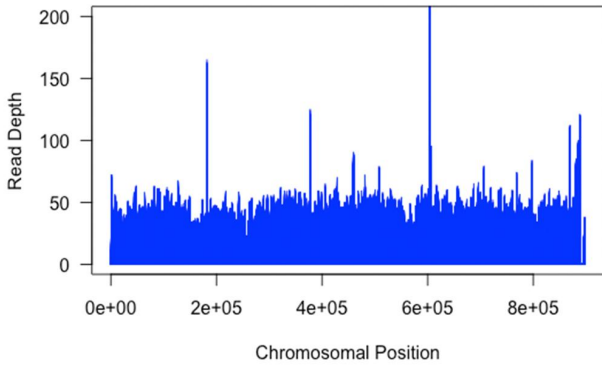

**VL38 - chr26**

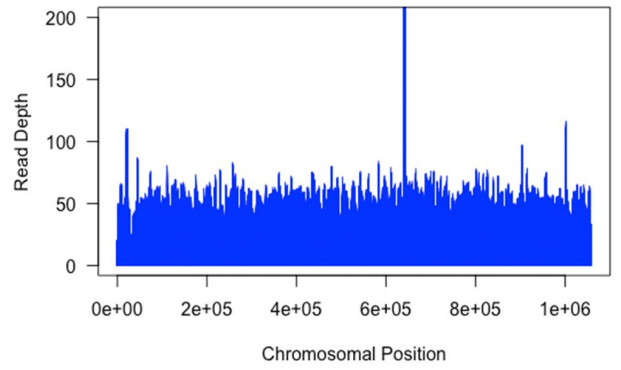

**VL38 - chr27**

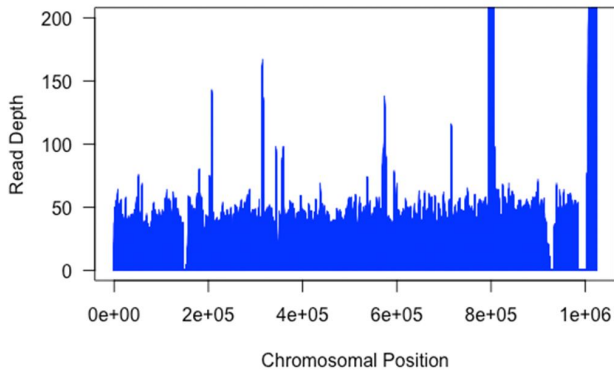

**VL38 - chr28**

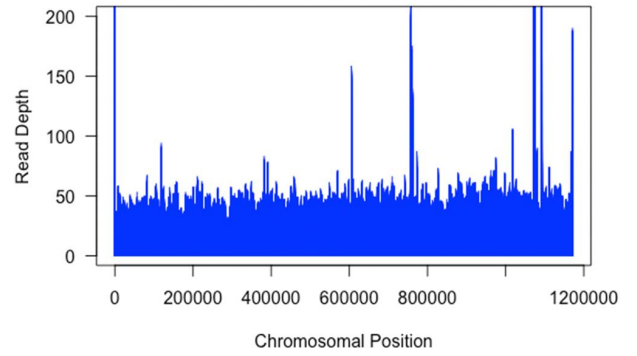

**VL38 - chr29**

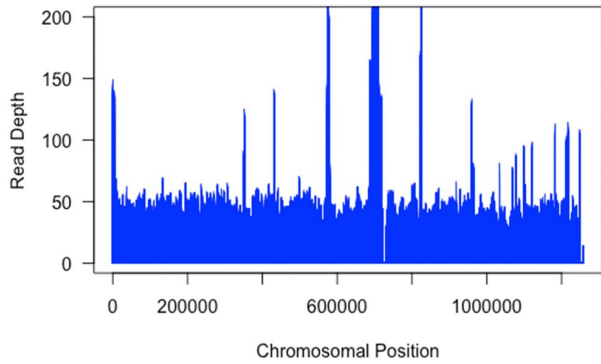

**VL38 - chr30**

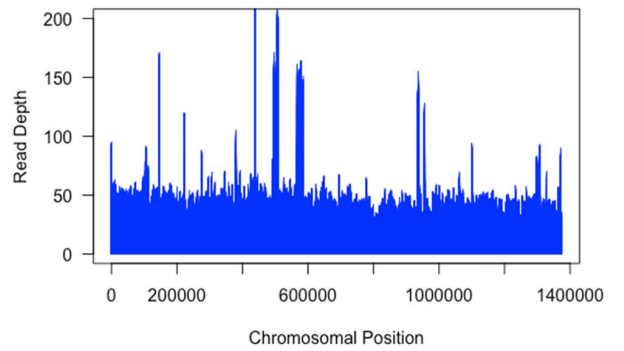

**VL38 - chr31**

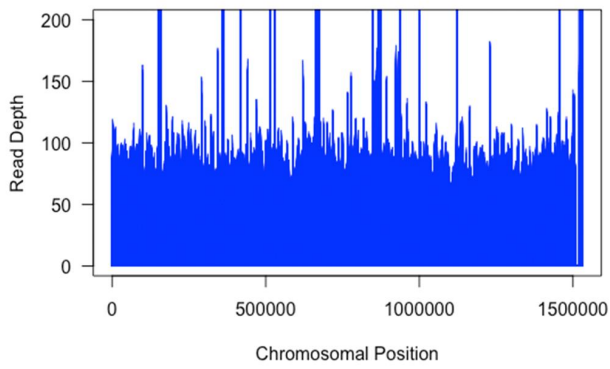

**VL38 - chr32**

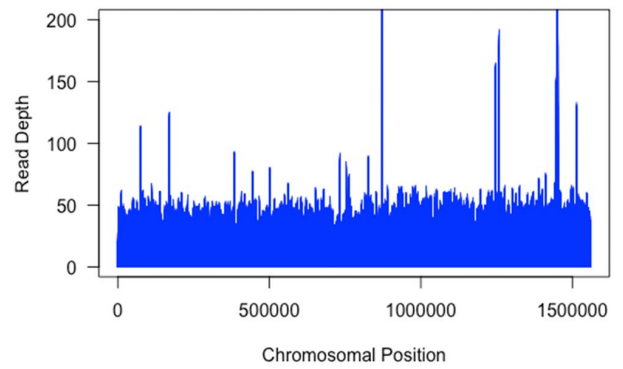

**VL38 - chr33**

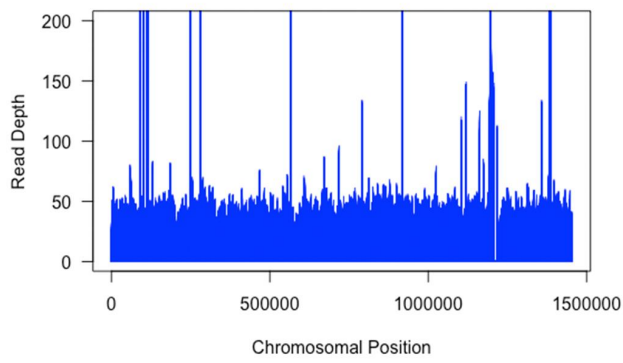

**VL38 - chr34**

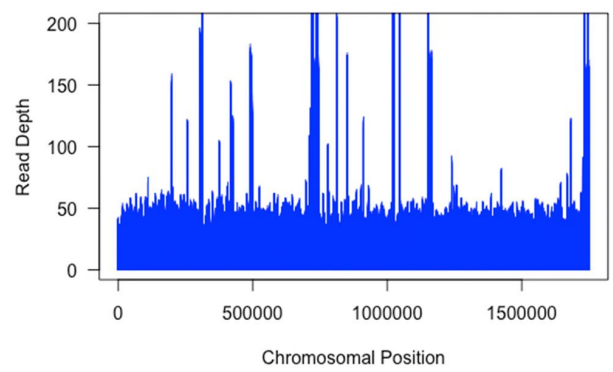

**VL38 - chr35**

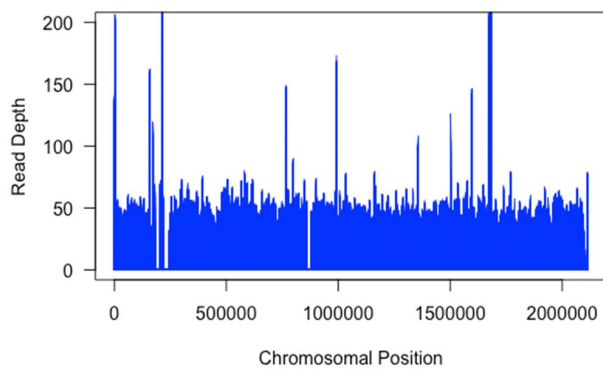

**VL38 - chr36**

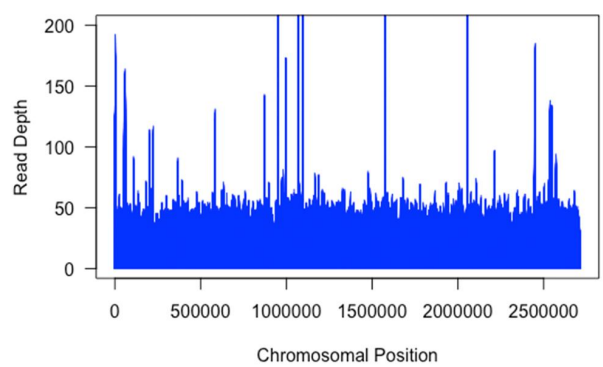

Supplement: 12864_2018_5271_MOESM3_ESM.pdf [file 12864_2018_5271_MOESM3_ESM.pdf]
