# Supplementary material for: Genomic insights into virulence mechanisms of Leishmania donovani: evidence from an atypical strain
Source: PubMed Central journal article supplement (PMC6262978; doi:10.1186/s12864-018-5271-z), 2018-11-28
Supplement: 12864_2018_5271_MOESM4_ESM.pdf [file 12864_2018_5271_MOESM4_ESM.pdf]

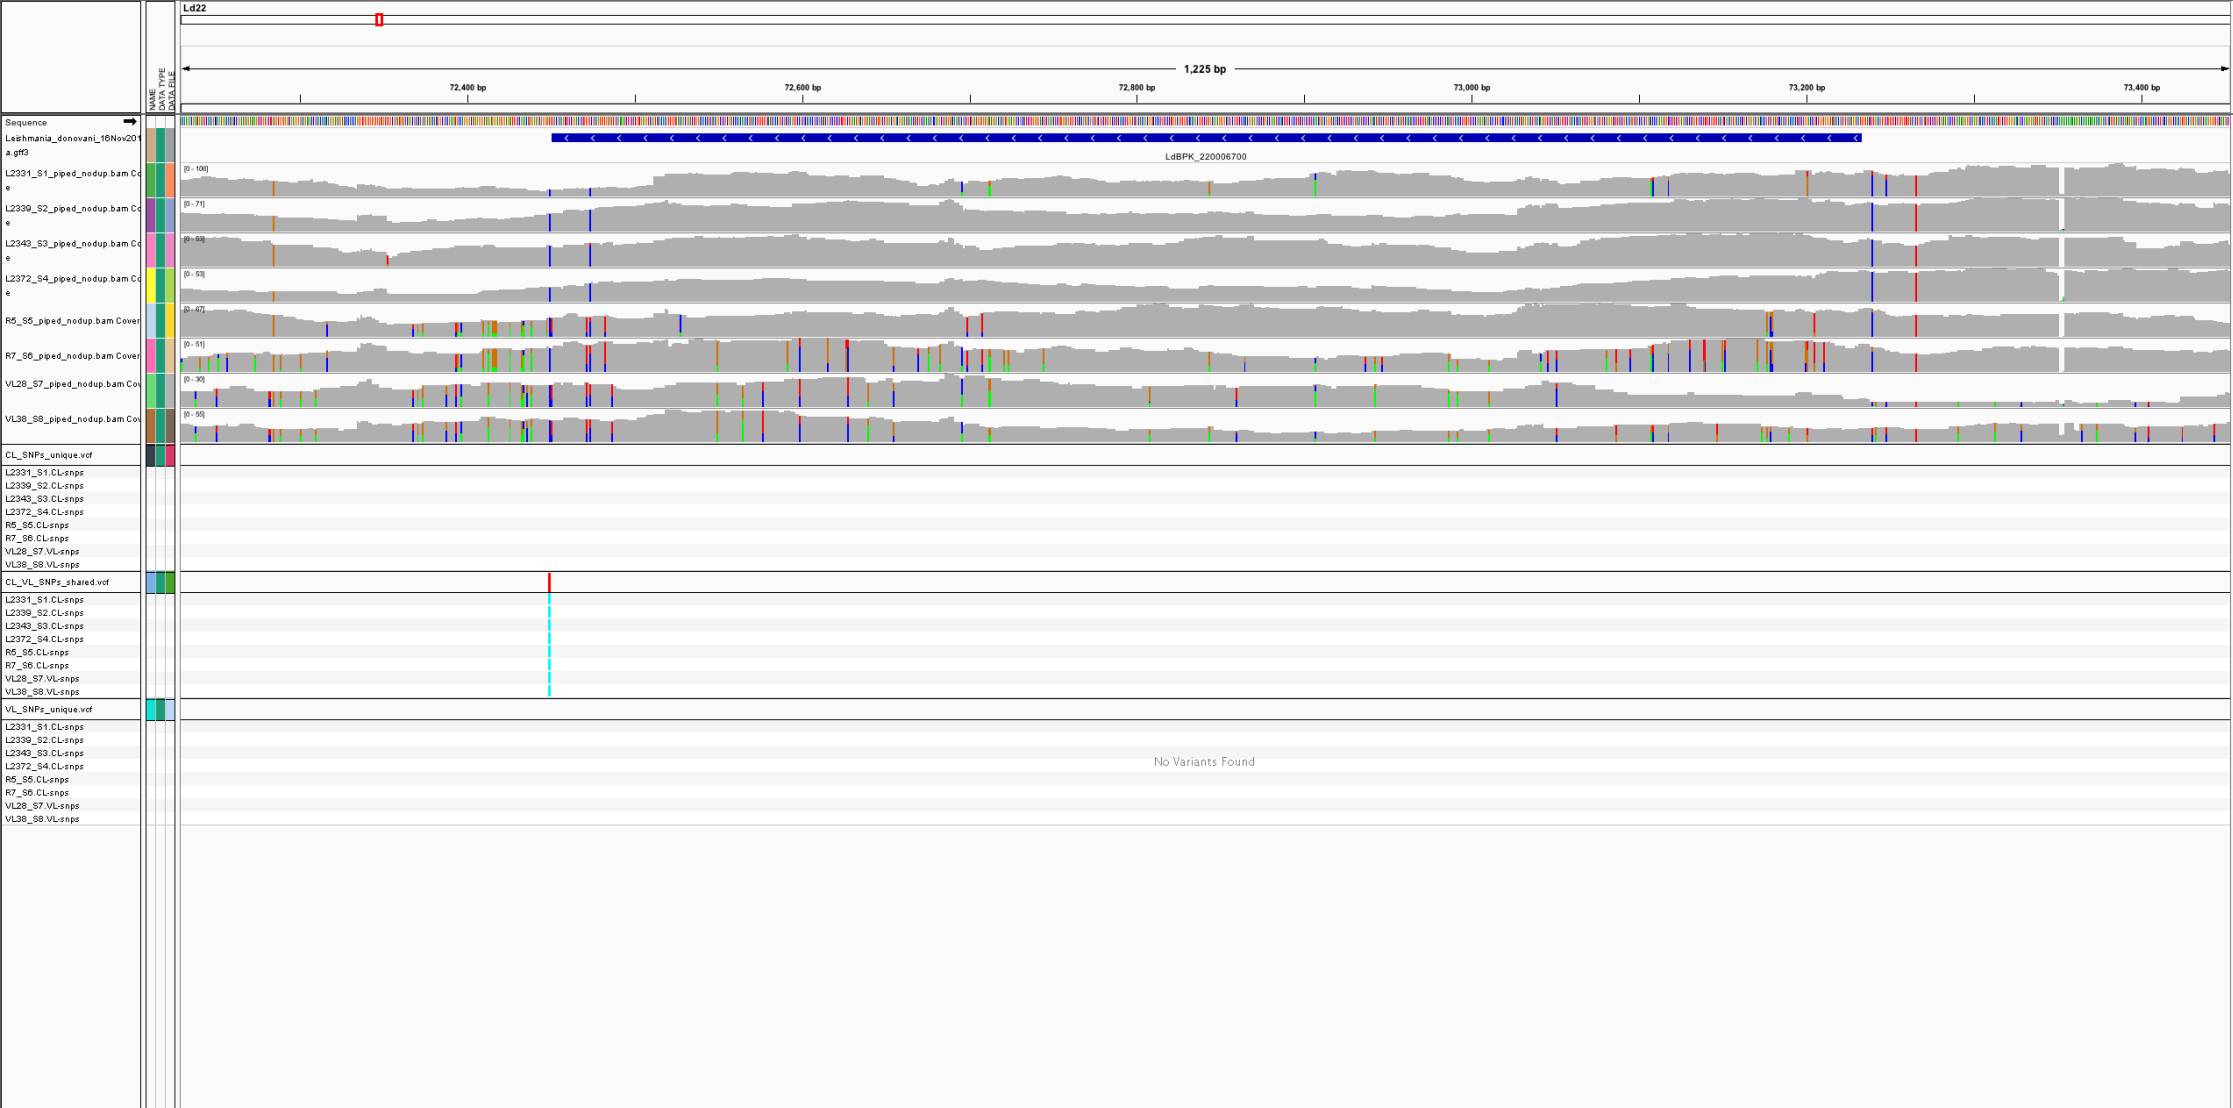

**Figure S1:** Comparison of read coverage across the A2 region (LdBPK\_220670, LdBPK\_220006700 in PacBio) in chromosome 23 of six CL-SL and two VL-SL clinical isolates. Reads were aligned to the new PacBio sequence of *L. donovani*. Only one SNP shared among the two groups of isolates was identified. Viewed using the IGV tool.
